# Supplementary material for: Motivational Determinants and Job Satisfaction Among Community Volunteers in Nutrition Service Delivery in Oyo State, Nigeria: A Mixed-Methods Study
Source: Research Square preprint supplement (doi:10.21203/rs.3.rs-7772634/v1), 2025-11-10
Supplement: Supplementary file 1 [file 9746598b6d4fbd16ebb22808.pdf]

## MOTIVATION AND SATISFACTION OF CVs IN OYO STATE

### QUESTIONNAIRE

Dear CV, this questionnaire is to obtain information on your activities on the ANRiN project. Please note that there are no wrong or right answers. The questionnaire will take 5 to 10 minutes to answer and we will appreciate your honest response. Thank you for your time.

| SN                                         | Questions and Filters                                                                                          | Code                                                    | Comments  |
|--------------------------------------------|----------------------------------------------------------------------------------------------------------------|---------------------------------------------------------|-----------|
| Q1                                         | What is your name                                                                                              |                                                         |           |
| Q2                                         | LGAs where you have worked                                                                                     |                                                         |           |
| Q3                                         | Please provide your current Age (in years)                                                                     |                                                         | Numerical |
| Q4                                         | What is your sex?                                                                                              | Male<br>Female                                          |           |
| Q5                                         | What is your religion?                                                                                         | Chritianity<br>Muslim<br>Traditional                    |           |
| Q7                                         | What is your level of education?                                                                               | No formal education<br>Primary<br>Secondary<br>Tertiary |           |
| Q8                                         | Marital Status                                                                                                 | Single<br>Married<br>Separated/Divorced<br>Widowed      |           |
| Q9                                         | What is your major/other Occupation?                                                                           |                                                         |           |
| Q10                                        | Do you have children living with you?                                                                          | Yes<br>No                                               |           |
| Q11                                        | Aside ANRiN, have you volunteered for other community health program                                           | Yes<br>No                                               |           |
| Q12                                        | How many health programmes have you volunteered for? (e.g 1,2,3,4)                                             |                                                         | Numerical |
| Q13                                        | How long have you worked as a health volunteer? (For any health programme at all) (Specify in years or months) |                                                         | Numerical |
| Q14                                        | How long have you been a CV for the ANRiN project? (Please specify the year or month)                          |                                                         | Numerical |
| Q15                                        | Do you work every day on the ANRiN project?                                                                    | Yes<br>No                                               |           |
| <b>Motivation as a Community Volunteer</b> |                                                                                                                |                                                         |           |

Kindly answer all questions in this section. Please choose the options that appears most appropriate to you. There is no right or wrong answer.

|     |                                                                   |                                                                                                                                                                                                                               |  |
|-----|-------------------------------------------------------------------|-------------------------------------------------------------------------------------------------------------------------------------------------------------------------------------------------------------------------------|--|
| Q16 | What is your motivation to be a CV?                               | Personal interest<br>Recognition in the community<br>Money<br>Desire to help others<br>Religious belief<br>Familiarity with community<br>Acquisition of knowledge<br>Networking<br>Others (Please Specify).....               |  |
| Q17 | What are your Challenges of working as a CV?                      | Safety<br>Community acceptance<br>No family support<br>Poor Payment<br>Process of service delivery<br>Incompatible phone<br>Health<br>Time<br>Meeting target<br>Documentation of data using daily registers and the ANRiN App |  |
| Q18 | The project staff are quick to resolve any challenges             | Strongly Agree<br>Agree<br>Neutral<br>Disagree<br>Strongly Disagree                                                                                                                                                           |  |
| Q19 | I get good support from project staff when there are challenges   | Strongly Agree<br>Agree<br>Neutral<br>Disagree<br>Strongly Disagree                                                                                                                                                           |  |
| Q20 | I enjoy good working relations with my colleagues on the project* | Strongly Agree<br>Agree<br>Neutral<br>Disagree<br>Strongly Disagree                                                                                                                                                           |  |
| Q21 | I like the treatment I receive from the project staff*            | Strongly Agree<br>Agree<br>Neutral<br>Disagree<br>Strongly Disagree                                                                                                                                                           |  |
| Q22 | I enjoy good working relations with supervisors/team leads*       | Strongly Agree<br>Agree                                                                                                                                                                                                       |  |

|     |                                                                                               |                                                                     |  |
|-----|-----------------------------------------------------------------------------------------------|---------------------------------------------------------------------|--|
|     |                                                                                               | Neutral<br>Disagree<br>Strongly Disagree                            |  |
| Q23 | My effort is recognised and I get appreciated for my achievement as a CV by the project staff | Strongly Agree<br>Agree<br>Neutral<br>Disagree<br>Strongly Disagree |  |
| Q24 | My social status in the community has improved because of being a volunteer                   | Strongly Agree<br>Agree<br>Neutral<br>Disagree<br>Strongly Disagree |  |
| Q25 | I like the resources provided for the project – registers, phones, power banks                | Strongly Agree<br>Agree<br>Neutral<br>Disagree<br>Strongly Disagree |  |
| Q26 | I like the financial reward I get from the project                                            | Strongly Agree<br>Agree<br>Neutral<br>Disagree<br>Strongly Disagree |  |
| Q27 | I like the non-financial benefits I receive on the project e.g. the end-of year gift          | Strongly Agree<br>Agree<br>Neutral<br>Disagree<br>Strongly Disagree |  |
| Q28 | The project staff really cares about my well-being                                            | Strongly Agree<br>Agree<br>Neutral<br>Disagree<br>Strongly Disagree |  |
| Q29 | I always complete my tasks efficiently and correctly                                          | Strongly Agree<br>Agree<br>Neutral<br>Disagree<br>Strongly Disagree |  |
| Q30 | I am glad to be a volunteer on the ANRiN project                                              | Strongly Agree<br>Agree<br>Neutral<br>Disagree<br>Strongly Disagree |  |

|     |                                                               |                                                                     |  |
|-----|---------------------------------------------------------------|---------------------------------------------------------------------|--|
| Q31 | I would like to work with the organisation on another project | Strongly Agree<br>Agree<br>Neutral<br>Disagree<br>Strongly Disagree |  |
|-----|---------------------------------------------------------------|---------------------------------------------------------------------|--|

**Satisfaction as a Community Volunteer**

Kindly answer all questions in this section. Please choose the options that appears most appropriate to you. There is no right or wrong answer.

|     |                                              |                                                                                                        |  |
|-----|----------------------------------------------|--------------------------------------------------------------------------------------------------------|--|
| Q32 | Payment received for work done               | Very Satisfied<br>Satisfied<br>Neither Satisfied nor Dissatisfied<br>Dissatisfied<br>Very Dissatisfied |  |
| Q33 | Mode of payment                              | Very Satisfied<br>Satisfied<br>Neither Satisfied nor Dissatisfied<br>Dissatisfied<br>Very Dissatisfied |  |
| Q34 | Other allowances given on the work           | Very Satisfied<br>Satisfied<br>Neither Satisfied nor Dissatisfied<br>Dissatisfied<br>Very Dissatisfied |  |
| Q35 | Time spent on the work                       | Very Satisfied<br>Satisfied<br>Neither Satisfied nor Dissatisfied<br>Dissatisfied<br>Very Dissatisfied |  |
| Q36 | Training Received                            | Very Satisfied<br>Satisfied<br>Neither Satisfied nor Dissatisfied<br>Dissatisfied<br>Very Dissatisfied |  |
| Q37 | Supervision received                         | Very Satisfied<br>Satisfied<br>Neither Satisfied nor Dissatisfied<br>Dissatisfied<br>Very Dissatisfied |  |
| Q38 | Supplies for the work – commodities, gadgets | Very Satisfied<br>Satisfied<br>Neither Satisfied nor Dissatisfied<br>Dissatisfied<br>Very Dissatisfied |  |
| Q39 | Community acceptance of the project          | Very Satisfied                                                                                         |  |

|     |                                                           |                                                                                                        |  |
|-----|-----------------------------------------------------------|--------------------------------------------------------------------------------------------------------|--|
|     |                                                           | Satisfied<br>Neither Satisfied nor Dissatisfied<br>Dissatisfied<br>Very Dissatisfied                   |  |
| Q40 | Target given to be achieved                               | Very Satisfied<br>Satisfied<br>Neither Satisfied nor Dissatisfied<br>Dissatisfied<br>Very Dissatisfied |  |
| Q41 | Documentation of data using daily registers and ANRiN App | Very Satisfied<br>Satisfied<br>Neither Satisfied nor Dissatisfied<br>Dissatisfied<br>Very Dissatisfied |  |

## Key Informant Interview (KII) Guide

**Target:** Local leaders, health workers, program coordinators

**Objective:** Explore external perceptions of CVs, program implementation, and community dynamics

| SN | Questions                                                                                                | Probe                                                                                                                                                                                                                                                   |
|----|----------------------------------------------------------------------------------------------------------|---------------------------------------------------------------------------------------------------------------------------------------------------------------------------------------------------------------------------------------------------------|
| 1  | Can you describe your role in relation to the ANRiN project?                                             | <ul style="list-style-type: none"> <li>- <i>What specific responsibilities do you have in relation to CVs?</i></li> <li>- <i>How long have you been involved with this project?</i></li> </ul>                                                          |
| 2  | How do you interact with community volunteers (CVs)?                                                     | <ul style="list-style-type: none"> <li>- <i>How frequently do you meet with them?</i></li> <li>- <i>What type of support, guidance, or supervision do you provide?</i></li> </ul>                                                                       |
| 3  | In your opinion, how effective are CVs in delivering maternal and child nutrition services?              | <ul style="list-style-type: none"> <li>- <i>Can you share examples of successful interventions or improvements linked to CVs?</i></li> <li>- <i>Are there areas where you feel CVs need additional training or support?</i></li> </ul>                  |
| 4  | How are they perceived by community members?                                                             | <ul style="list-style-type: none"> <li>- <i>Are CVs trusted by mothers and caregivers?</i></li> <li>- <i>Do cultural, religious, or gender dynamics influence community perceptions of CVs?</i></li> </ul>                                              |
| 5  | What factors help keep CVs engaged and motivated?                                                        | <ul style="list-style-type: none"> <li>- <i>Do incentives (financial or non-financial) play a major role?</i></li> <li>- <i>How does recognition by community leaders or health officials influence motivation?</i></li> </ul>                          |
| 6  | Have you noticed challenges in retaining CVs?                                                            | <ul style="list-style-type: none"> <li>- <i>What are the common reasons for attrition or drop-out?</i></li> <li>- <i>Are these challenges more common in certain groups (e.g., younger vs. older volunteers, men vs. women)?</i></li> </ul>             |
| 7  | What sociocultural, logistical, or gender-related barriers have you observed that affect CV performance? | <ul style="list-style-type: none"> <li>- <i>Are there cultural beliefs or traditional practices that hinder service uptake?</i></li> <li>- <i>How do transport or financial constraints affect their work?</i></li> </ul>                               |
| 8  | How do CVs overcome community resistance?                                                                | <ul style="list-style-type: none"> <li>- <i>Have you seen CVs use particular strategies (e.g., involving local leaders, using religious institutions)?</i></li> <li>- <i>Can you share a case where resistance was successfully managed?</i></li> </ul> |
| 9  | What improvements would you recommend to strengthen the role of CVs in nutrition programs?               | <ul style="list-style-type: none"> <li>- <i>What changes should be made at the program design level?</i></li> <li>- <i>What kind of training, supervision, or incentives should be added?</i></li> </ul>                                                |

## In-Depth Interview (IDI) Guide

**Target:** Individual CVs

**Objective:** Understand personal experiences, motivation, satisfaction, and challenges

| SN | Questions                                                                                                | Probe                                                                                                                                                                                                                                                   |
|----|----------------------------------------------------------------------------------------------------------|---------------------------------------------------------------------------------------------------------------------------------------------------------------------------------------------------------------------------------------------------------|
| 1  | Can you describe your role in relation to the ANRiN project?                                             | <ul style="list-style-type: none"> <li>- <i>What specific responsibilities do you have in relation to CVs?</i></li> <li>- <i>How long have you been involved with this project?</i></li> </ul>                                                          |
| 2  | How do you interact with community volunteers (CVs)?                                                     | <ul style="list-style-type: none"> <li>- <i>How frequently do you meet with them?</i></li> <li>- <i>What type of support, guidance, or supervision do you provide?</i></li> </ul>                                                                       |
| 3  | In your opinion, how effective are CVs in delivering maternal and child nutrition services?              | <ul style="list-style-type: none"> <li>- <i>Can you share examples of successful interventions or improvements linked to CVs?</i></li> <li>- <i>Are there areas where you feel CVs need additional training or support?</i></li> </ul>                  |
| 4  | How are they perceived by community members?                                                             | <ul style="list-style-type: none"> <li>- <i>Are CVs trusted by mothers and caregivers?</i></li> <li>- <i>Do cultural, religious, or gender dynamics influence community perceptions of CVs?</i></li> </ul>                                              |
| 5  | What factors help keep CVs engaged and motivated?                                                        | <ul style="list-style-type: none"> <li>- <i>Do incentives (financial or non-financial) play a major role?</i></li> <li>- <i>How does recognition by community leaders or health officials influence motivation?</i></li> </ul>                          |
| 6  | Have you noticed challenges in retaining CVs?                                                            | <ul style="list-style-type: none"> <li>- <i>What are the common reasons for attrition or drop-out?</i></li> <li>- <i>Are these challenges more common in certain groups (e.g., younger vs. older volunteers, men vs. women)?</i></li> </ul>             |
| 7  | What sociocultural, logistical, or gender-related barriers have you observed that affect CV performance? | <ul style="list-style-type: none"> <li>- <i>Are there cultural beliefs or traditional practices that hinder service uptake?</i></li> <li>- <i>How do transport or financial constraints affect their work?</i></li> </ul>                               |
| 8  | How do CVs overcome community resistance?                                                                | <ul style="list-style-type: none"> <li>- <i>Have you seen CVs use particular strategies (e.g., involving local leaders, using religious institutions)?</i></li> <li>- <i>Can you share a case where resistance was successfully managed?</i></li> </ul> |
| 9  | What improvements would you recommend to strengthen the role of CVs in nutrition programs?               | <ul style="list-style-type: none"> <li>- <i>What changes should be made at the program design level?</i></li> <li>- <i>What kind of training, supervision, or incentives should be added?</i></li> </ul>                                                |

## Focus Group Discussion (FGD) Guide

**Target:** Groups of CVs (6–10 participants per group, stratified by region)

**Objective:** Capture collective experiences, common themes, and variations

### Focus Group Discussion (FGD) Guide for Community Volunteers (CVs)

| SN | Questions                                                                                       | Probes                                                                                                                                                                                                                                     |
|----|-------------------------------------------------------------------------------------------------|--------------------------------------------------------------------------------------------------------------------------------------------------------------------------------------------------------------------------------------------|
| 1  | What motivated you to become a CV?                                                              | <ul style="list-style-type: none"> <li>- <i>Was it financial, recognition, or the desire to help your community?</i></li> <li>- <i>Did family, friends, or leaders influence your decision?</i></li> </ul>                                 |
| 2  | What do you see as the main role of CVs in this community?                                      | <ul style="list-style-type: none"> <li>- <i>How do you explain your work to others?</i></li> <li>- <i>Do you feel your role is well recognized by the community?</i></li> </ul>                                                            |
| 3  | Share an example of a time when your work made a big difference.                                | <ul style="list-style-type: none"> <li>- <i>What exactly did you do?</i><br/><i>How did the family or community respond?</i></li> <li>- <i>Did this experience change how you feel about your role?</i></li> </ul>                         |
| 4  | What aspects of your work make you most satisfied?                                              | <ul style="list-style-type: none"> <li>- <i>Is it when mothers follow your advice, when children improve, or when you receive recognition?</i></li> <li>- <i>How do you celebrate successes as a group?</i></li> </ul>                     |
| 5  | What challenges reduce your motivation?                                                         | <ul style="list-style-type: none"> <li>- <i>Do transport costs, community resistance, or lack of incentives discourage you most?</i><br/><i>How do you cope with these challenges?</i></li> </ul>                                          |
| 6  | How do training and supervision help you in your role?                                          | <ul style="list-style-type: none"> <li>- <i>What trainings have been most useful?</i><br/><i>Are there gaps in the training you wish were addressed?</i></li> <li>- <i>How often do you receive supervision and feedback?</i></li> </ul>   |
| 7  | Are the financial and non-financial incentives adequate?                                        | <ul style="list-style-type: none"> <li>- <i>How well do the allowances cover your costs?</i></li> <li>- <i>Do non-financial incentives (recognition, respect, opportunities) make a difference?</i></li> </ul>                             |
| 8  | How do households respond to your messages?                                                     | <ul style="list-style-type: none"> <li>- <i>Are they usually receptive, resistant, or selective?</i></li> <li>- <i>Do men and women respond differently?</i></li> </ul>                                                                    |
| 9  | What cultural or gender barriers affect your work?                                              | <ul style="list-style-type: none"> <li>- <i>Have you encountered situations where husbands or elders prevent uptake of services?</i></li> <li>- <i>Do certain cultural beliefs or ethnic differences make your work harder?</i></li> </ul> |
| 10 | As a group, how do you manage challenges like transport, distrust, or ethnic/language barriers? | <ul style="list-style-type: none"> <li>- <i>What creative solutions have you come up with?</i></li> <li>- <i>Do you support each other in overcoming these issues?</i></li> </ul>                                                          |

|    |                                                                         |                                                                                                                                                                                                         |
|----|-------------------------------------------------------------------------|---------------------------------------------------------------------------------------------------------------------------------------------------------------------------------------------------------|
| 11 | What strategies have worked best?                                       | <ul style="list-style-type: none"><li>- <i>Can you share specific examples of approaches that improved acceptance?</i></li><li>- <i>How did community leaders or champions help?</i></li></ul>          |
| 12 | What would you suggest to improve this program for volunteers like you? | <ul style="list-style-type: none"><li>- <i>What immediate changes would make your work easier?</i></li><li>- <i>What long-term changes would sustain your motivation?</i></li></ul>                     |
| 13 | How can the community better support you?                               | <ul style="list-style-type: none"><li>- <i>What role should leaders, men, or other groups play?</i></li><li>- <i>Are there ways the community could share transport, space, or resources?</i></li></ul> |
